# Supplementary material for: Maintenance therapy for FLT3-ITD-mutated acute myeloid leukemia
Source: PubMed Central journal article supplement — Haematologica. 2021 Jan 21;106(3):664–70. doi: 10.3324/haematol.2019.240747 (PMC7927878; doi:10.3324/haematol.2019.240747), 2021-01-21
Supplement: 2019_240747-Disclosure.pdf [file 2019_240747-Disclosure.pdf]

Haematologica  
HAEMATOL/2019/240747  
Version 3

Maintenance therapy for FLT3-ITD-mutated acute myeloid leukemia

Andreas Burchert

Disclosures: Novartis, BMS, AOP Orphan - research support Novartis, BMS, AOP Orphan, Pfizer, Abbvie - advisory board and honoraria
